# Supplementary material for: Beyond the Penrose Hypothesis: Examining the Association between the Availability of Psychiatric Care and National Homicide Rates in 166 Countries
Source: MDPI journal article supplement (doi:10.3390/forensicsci2040049), 2022-10-14
Supplement: s1 [file s1]

**Supplementary Table S1.** Complete correlation matrix of all study variables.

| Var | 1<br>HT | 2<br>HM                    | 3<br>HF                    | 4<br>Psy                    | 5<br>PB                    | 6<br>GB                     | 7<br>GNI                    | 8<br>Gini                   | 9<br>SC                    | 10<br>Unemp    | 11<br>Edu                  | 12<br>F20                   | 13<br>SUD                  | 14<br>Prison               |
|-----|---------|----------------------------|----------------------------|-----------------------------|----------------------------|-----------------------------|-----------------------------|-----------------------------|----------------------------|----------------|----------------------------|-----------------------------|----------------------------|----------------------------|
| 1   | -       | .99<br>( <b>&lt;.001</b> ) | .94<br>( <b>&lt;.001</b> ) | -.32<br>( <b>&lt;.001</b> ) | -.10<br>(.243)             | -.43<br>( <b>&lt;.001</b> ) | -.37<br>( <b>&lt;.001</b> ) | .58<br>( <b>&lt;.001</b> )  | -.16<br>(.093)             | .10<br>(.197)  | -.21<br>(.007)             | -.35<br>( <b>&lt;.001</b> ) | .01<br>(.884)              | .32<br>( <b>&lt;.001</b> ) |
| 2   |         | -                          | .90<br>( <b>&lt;.001</b> ) | -.32<br>( <b>&lt;.001</b> ) | -.12<br>(.175)             | -.44<br>( <b>&lt;.001</b> ) | -.39<br>( <b>&lt;.001</b> ) | .57<br>( <b>&lt;.001</b> )  | -.18<br>(.058)             | .09<br>(.267)  | -.22<br>(.005)             | -.35<br>( <b>&lt;.001</b> ) | -.01<br>(.916)             | .32<br>( <b>&lt;.001</b> ) |
| 3   |         |                            | -                          | -.28<br>(.001)              | -.04<br>(.676)             | -.33<br>( <b>&lt;.001</b> ) | -.31<br>( <b>&lt;.001</b> ) | .51<br>( <b>&lt;.001</b> )  | -.11<br>(.218)             | .15<br>(.066)  | -.18<br>(.024)             | -.33<br>( <b>&lt;.001</b> ) | .07<br>(.368)              | .26<br>(.001)              |
| 4   |         |                            |                            | -                           | .66<br>( <b>&lt;.001</b> ) | .64<br>( <b>&lt;.001</b> )  | .81<br>( <b>&lt;.001</b> )  | -.38<br>( <b>&lt;.001</b> ) | .42<br>( <b>&lt;.001</b> ) | .23<br>(.007)  | .80<br>( <b>&lt;.001</b> ) | .86<br>( <b>&lt;.001</b> )  | .70<br>( <b>&lt;.001</b> ) | .37<br>( <b>&lt;.001</b> ) |
| 5   |         |                            |                            |                             | -                          | .41<br>( <b>&lt;.001</b> )  | .50<br>( <b>&lt;.001</b> )  | -.38<br>( <b>&lt;.001</b> ) | .20<br>(.047)              | .21<br>(.022)  | .68<br>( <b>&lt;.001</b> ) | .56<br>( <b>&lt;.001</b> )  | .54<br>( <b>&lt;.001</b> ) | .27<br>(.002)              |
| 6   |         |                            |                            |                             |                            | -                           | .52<br>( <b>&lt;.001</b> )  | -.31<br>(.002)              | .38<br>( <b>&lt;.001</b> ) | .21<br>(.027)  | .53<br>( <b>&lt;.001</b> ) | .49<br>( <b>&lt;.001</b> )  | .46<br>( <b>&lt;.001</b> ) | .11<br>(.261)              |
| 7   |         |                            |                            |                             |                            |                             | -                           | -.29<br>( <b>&lt;.001</b> ) | .57<br>( <b>&lt;.001</b> ) | .14<br>(.076)  | .79<br>( <b>&lt;.001</b> ) | .83<br>( <b>&lt;.001</b> )  | .60<br>( <b>&lt;.001</b> ) | .27<br>( <b>&lt;.001</b> ) |
| 8   |         |                            |                            |                             |                            |                             |                             | -                           | -.03<br>(.769)             | .03<br>(.711)  | -.27<br>(.001)             | -.39<br>( <b>&lt;.001</b> ) | -.13<br>(.125)             | .21<br>(.013)              |
| 9   |         |                            |                            |                             |                            |                             |                             |                             | -                          | -.13<br>(.147) | .44<br>( <b>&lt;.001</b> ) | .42<br>( <b>&lt;.001</b> )  | .40<br>( <b>&lt;.001</b> ) | .07<br>(.460)              |
| 10  |         |                            |                            |                             |                            |                             |                             |                             |                            | -              | .23<br>(.004)              | .09<br>(.239)               | .171<br>(.032)             | .057<br>(.483)             |
| 11  |         |                            |                            |                             |                            |                             |                             |                             |                            |                | -                          | .83<br>( <b>&lt;.001</b> )  | .70<br>( <b>&lt;.001</b> ) | .40<br>( <b>&lt;.001</b> ) |
| 12  |         |                            |                            |                             |                            |                             |                             |                             |                            |                |                            | -                           | .67<br>( <b>&lt;.001</b> ) | .40<br>( <b>&lt;.001</b> ) |
| 13  |         |                            |                            |                             |                            |                             |                             |                             |                            |                |                            |                             | -                          | .42<br>( <b>&lt;.001</b> ) |

**Abbreviations:** HT, total homicide rate (Global Burden of Disease 2019); HM, male homicide rate (Global Burden of Disease 2019); HF, female homicide rate (Global Burden of Disease 2019); Psy, number of psychiatrists per 100,000 population (World Health Organization 2015-16); PB, number of dedicated psychiatric beds per 100,000 population (World Health Organization 2015-16); GB, number of general hospital psychiatric beds per 100,000 population (World Health Organization 2015-16); GNI, gross national income per capita (PPP method, US\$); Gini, Gini coefficient of income inequality; SC, social capital (Legatum Index, social capital sub-scale score); Unemp, unemployment rate (%); Edu, average years of education per adult; F20, estimated prevalence of schizophrenia (Global Burden of Disease 2015); SUD, estimated prevalence of substance use disorders (Global Burden of Disease 2015); Prison, national prison population (number of inmates per 100,000 population).

**Notes:**

- a. All values are given as correlation coefficient (Pearson's  $r$ ) and significance level for a two-tailed test.
- b. Values significant at  $p < .05$  are indicated in **bold**.
